# Supplementary material for: How Do Small Differences in Geometries Affect Electrostatic Potentials of High-Energy Molecules? Critical News from Critical Points
Source: MDPI journal article supplement (doi:10.3390/cryst12101455), 2022-10-14
Supplement: s1 [file s1]

## Supporting Information

# How do small differences in geometries affect electrostatic potentials of high-energy molecules? Critical news from critical points.

Danijela S. Kretić, Vesna B. Medaković and Dušan Ž. Veljković

**Table S1.** Crystal structures extracted from Cambridge structural Database containing TNB molecule.

| Number | Refcode  |
|--------|----------|
| 1      | PYRTNB03 |
| 2      | PYRTNB04 |
| 3      | ABUNIU   |
| 4      | ABUNIU01 |
| 5      | APANBZ   |
| 6      | ASKNBZ   |
| 7      | BDTNBB   |
| 8      | BZATNB20 |
| 9      | CAXXII   |
| 10     | CBZTNB   |
| 11     | CPCTNB   |
| 12     | DBTTNB   |
| 13     | DUGZEL   |
| 14     | GEXMED   |
| 15     | HENMOC   |
| 16     | HQUNBZ   |
| 17     | HUZSEA   |
| 18     | IPINEA   |
| 19     | IPINIE   |
| 20     | IPINOK   |
| 21     | IPINUQ   |
| 22     | IPIPAY   |
| 23     | JESCAL   |
| 24     | JIZFEE   |
| 25     | KIXHEE   |
| 26     | KOSMUA   |
| 27     | LIHKUK   |
| 28     | MESWEP   |
| 29     | MESWIT   |
| 30     | MESWOZ   |
| 31     | MESWUF   |

|    |          |
|----|----------|
| 32 | MIGROJ   |
| 33 | NAQVOT   |
| 34 | NIBJUF   |
| 35 | NIBZAM   |
| 36 | NIXJOT   |
| 37 | OJUJIO   |
| 38 | OJUJOU   |
| 39 | OJUJUA   |
| 40 | OJUKAH   |
| 41 | OJUKEL   |
| 42 | OJUKIP   |
| 43 | OJUKOV   |
| 44 | OJUKUB   |
| 45 | OJULAI   |
| 46 | OJULEM   |
| 47 | ORIMIN   |
| 48 | ORIMOT   |
| 49 | PEVKIK   |
| 50 | PEVKIK01 |
| 51 | PHNSNB11 |
| 52 | PHNSNB12 |
| 53 | POCVIP   |
| 54 | POJDAT   |
| 55 | PVVBFD01 |
| 56 | PVVBKP01 |
| 57 | PYRTNB   |
| 58 | RULLUF   |
| 59 | RUYKUR   |
| 60 | RUYLAY   |
| 61 | RUYLEC   |
| 62 | SESFEE   |
| 63 | SUGCAY   |
| 64 | TNBENZ10 |
| 65 | TNBENZ11 |
| 66 | TNBENZ12 |
| 67 | TNBENZ13 |
| 68 | TNBFBT   |
| 69 | TNBMSC   |
| 70 | TNBSCO   |
| 71 | TNBSCU   |
| 72 | TNBSNI   |
| 73 | UQAMIK   |
| 74 | VEWJIQ   |

|    |          |
|----|----------|
| 75 | VIGKIF   |
| 76 | VIGKUR   |
| 77 | VIGLEC   |
| 78 | VIGLOM   |
| 79 | VOCJAY   |
| 80 | WIKTEP   |
| 81 | WOJWAT   |
| 82 | WOJWIB   |
| 83 | WOJWOH   |
| 84 | WOJWUN   |
| 85 | WOJXEY   |
| 86 | XAHZAH   |
| 87 | YAJGUL   |
| 88 | YURPAD   |
| 89 | YURPIL   |
| 90 | ZAWPUI   |
| 91 | ZOPGOC   |
| 92 | ZZZAGS10 |

**Table S2.** Crystal structures extracted from Cambridge structural Database containing TNP molecule.

| Number | Refcode  |
|--------|----------|
| 1      | XOCLOS01 |
| 2      | ANOTAZ   |
| 3      | ANTPIC   |
| 4      | BODSUL   |
| 5      | BUFCEL01 |
| 6      | CBCPIC   |
| 7      | DOGLEQ   |
| 8      | DUGXOU   |
| 9      | FIZPEK   |
| 10     | GIRPON   |
| 11     | GIYDEX   |
| 12     | GUNDUP   |
| 13     | HAGBOG   |
| 14     | HARJOB   |
| 15     | KODYIM   |
| 16     | KORGUV   |
| 17     | LOFVOS   |
| 18     | LOWJUC   |
| 19     | LOWKAJ   |
| 20     | MIGTEC01 |
| 21     | NEBFUV   |

|    |          |
|----|----------|
| 22 | NEVKAB   |
| 23 | NEVKAB01 |
| 24 | NIXKEK   |
| 25 | NIXKIO   |
| 26 | OKUMOY   |
| 27 | PICRAC   |
| 28 | PICRAC11 |
| 29 | PICRAC12 |
| 30 | PICRAC13 |
| 31 | PICRAC14 |
| 32 | PICRAC15 |
| 33 | PICRAC16 |
| 34 | PICRAC17 |
| 35 | PICRAC18 |
| 36 | PICRAC19 |
| 37 | POCVOV   |
| 38 | PUKHEJ   |
| 39 | PVVBGS01 |
| 40 | QEGKIW   |
| 41 | QONYUP   |
| 42 | QONYUP01 |
| 43 | QUPNAQ   |
| 44 | RATBET   |
| 45 | SASKOO02 |
| 46 | SEKJAW   |
| 47 | TERSAK   |
| 48 | TIHMOO   |
| 49 | UNUQOK   |
| 50 | WOBPIN   |
| 51 | WUPTIK   |
| 52 | XAGRIJ   |
| 53 | XEFDAN   |
| 54 | YECNEZ   |
| 55 | YEQJEM   |
| 56 | YUQHEY   |
| 57 | ZECXEN   |
| 58 | ZILLUB   |
| 59 | ZILMAI   |
| 60 | ZILMEM01 |
| 61 | ZZZAGV01 |

**Table S3.** Crystal structures extracted from Cambridge structural Database containing TNT molecule.

| Number | Refcode  |
|--------|----------|
| 1      | DIFZOK   |
| 2      | FETYAE   |
| 3      | FONHOH   |
| 4      | IZUZUZ   |
| 5      | IZUZUZ01 |
| 6      | IZUZUZ02 |
| 7      | NIBJUF   |
| 8      | QINLEH   |
| 9      | TOZMUS   |
| 10     | URIHUZ   |
| 11     | URIJAH   |
| 12     | URIJEL   |
| 13     | URIJIP   |
| 14     | URIJUB   |
| 15     | URIKAI   |
| 16     | URIKEM   |
| 17     | URIKOW   |
| 18     | URIKUC   |
| 19     | URILAJ   |
| 20     | URILEN   |
| 21     | URILIR   |
| 22     | URILOX   |
| 23     | URILUD   |
| 24     | URIMAK   |
| 25     | ZZZMUC01 |
| 26     | ZZZMUC05 |
| 27     | ZZZMUC06 |
| 28     | ZZZMUC08 |
| 29     | ZZZMUC09 |

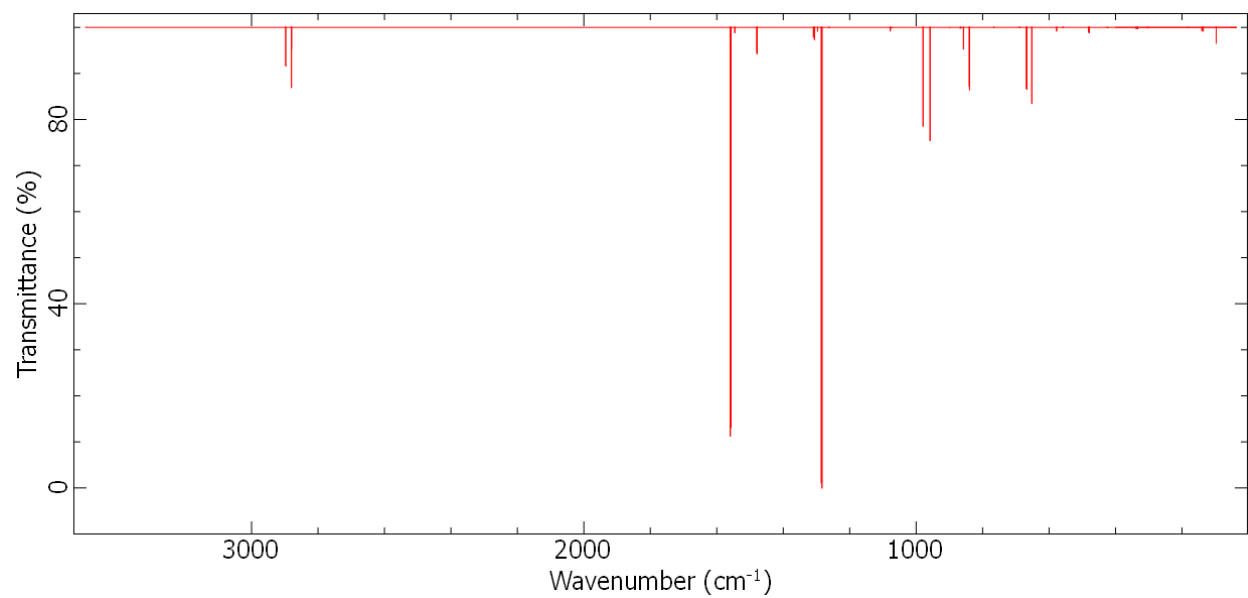

**Figure S1.** IR spectra calculated for the optimized TNB structure using M06/cc-PVDZ level of theory.

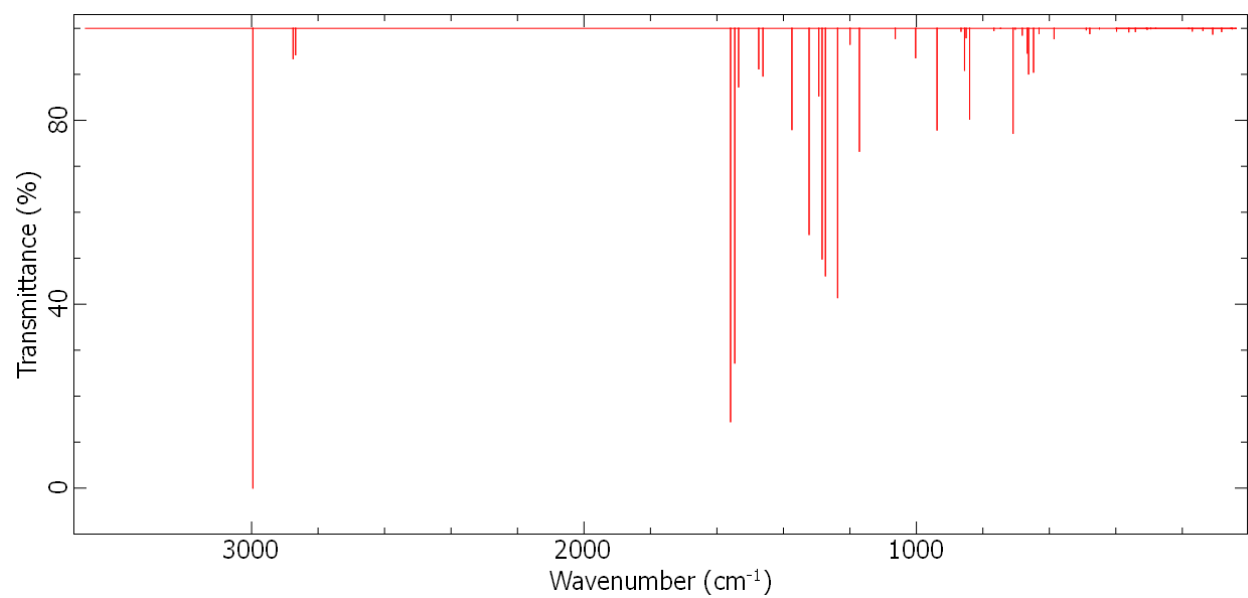

**Figure S2.** IR spectra calculated for the optimized TNP structure using M06/cc-PVDZ level of theory.

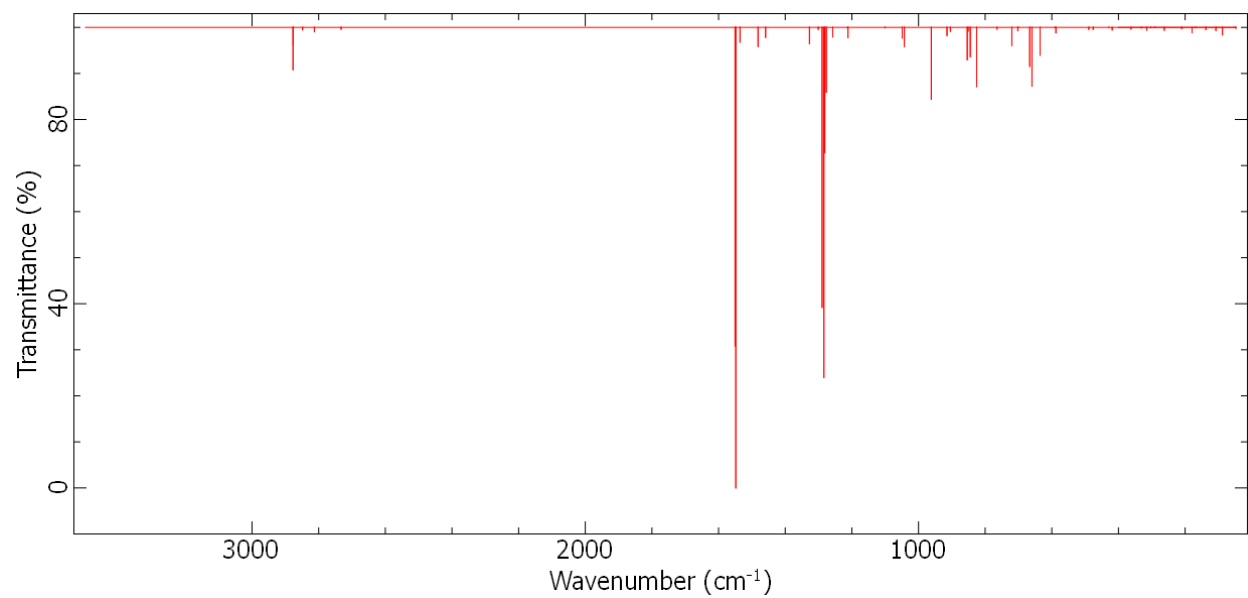

**Figure S3.** IR spectra calculated for the optimized TNT structure using M06/cc-PVDZ level of theory.

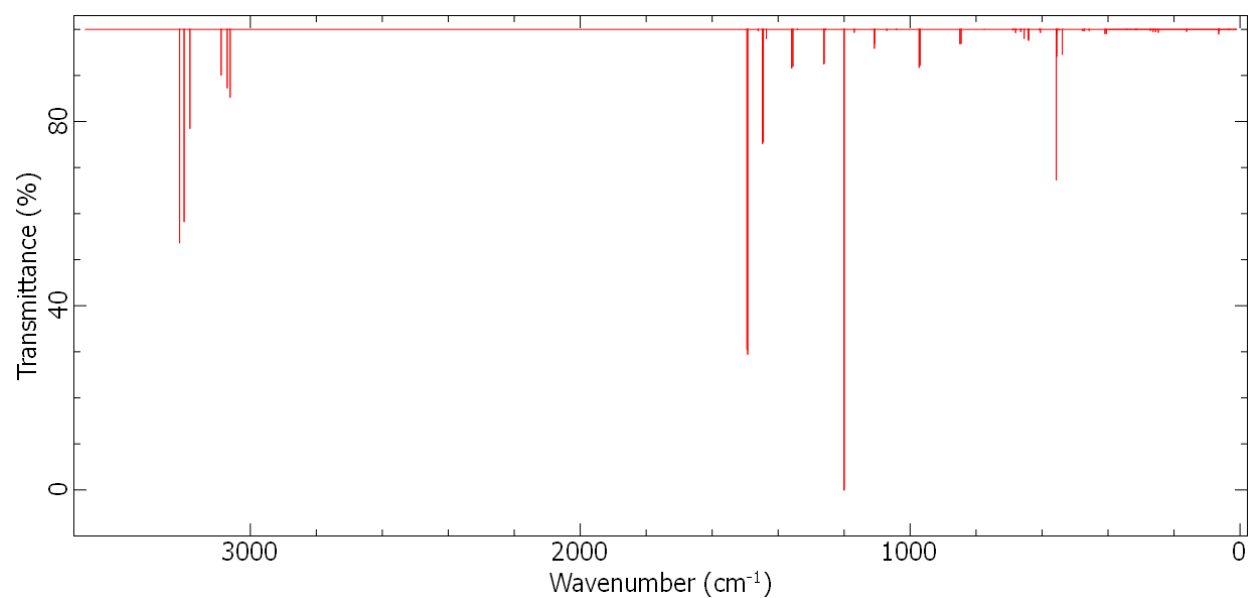

**Figure S4.** IR spectra calculated for the optimized TATB structure using M06/cc-PVDZ level of theory.

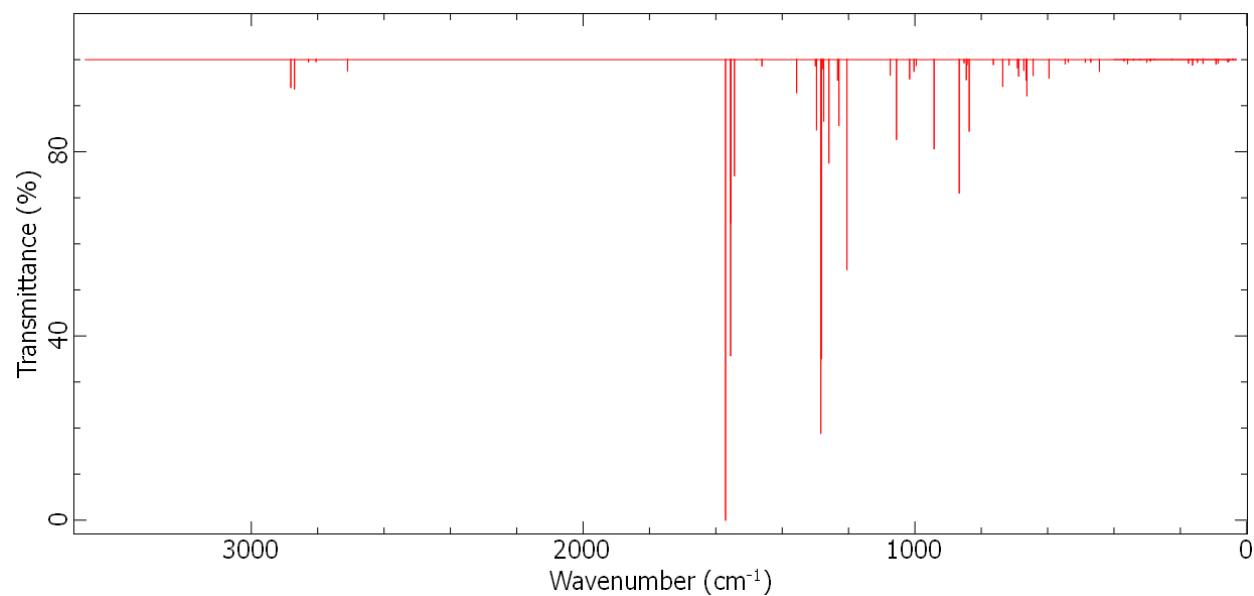

**Figure S5.** IR spectra calculated for the optimized TETRYL structure using M06/cc-PVDZ level of theory.

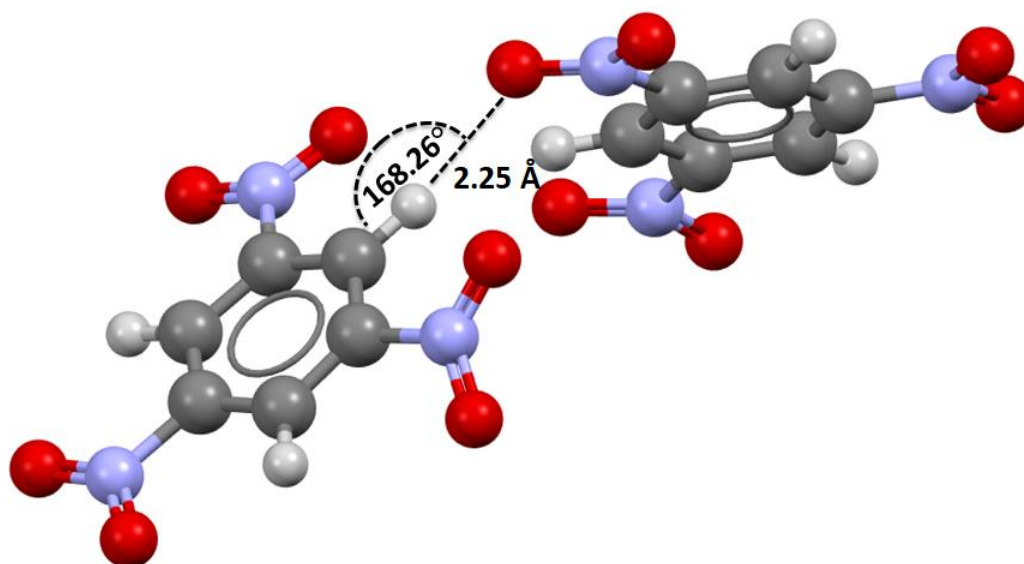

**Figure S6.** C-H/O interactions between TNB molecules in the crystal structure TNBENZ10. The distance between interacting H and O atoms in this interaction is 2.25 Å, while C-H-O angle is 168.26°.
